# Supplementary material for: Multiclass Classifier for P-Glycoprotein Substrates, Inhibitors, and Non-Active Compounds
Source: MDPI journal article supplement (doi:10.3390/molecules24102006), 2019-05-25
Supplement: s1 [file s1]

Supplementary Materials for:

## Multiclass Classifier for P-glycoprotein Substrates, Inhibitors, and Non-Active Compounds

Liadys Mora Lagares <sup>1,2</sup>, Nikola Minovski <sup>1</sup> and Marjana Novič <sup>1,\*</sup>

<sup>1</sup> Theory Department, Laboratory for Cheminformatics, National Institute of Chemistry, Ljubljana, Slovenia;  
[marjana.novic@ki.si](mailto:marjana.novic@ki.si), [nikola.minovski@ki.si](mailto:nikola.minovski@ki.si), [liadys.moralagares@ki.si](mailto:liadys.moralagares@ki.si)

<sup>2</sup> Jozef Stefan International Postgraduate School, Ljubljana, Slovenia

\* Correspondence: [marjana.novic@ki.si](mailto:marjana.novic@ki.si); Tel.: +386-01-476-0253

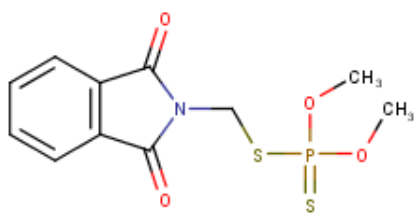

(a)

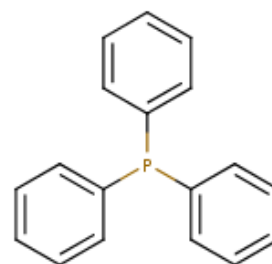

(b)

**Figure S1.** Structures of the compound with largest ED to the central neuron in the TE set: (a) Phosmed; (b) Triphenylphosphane.

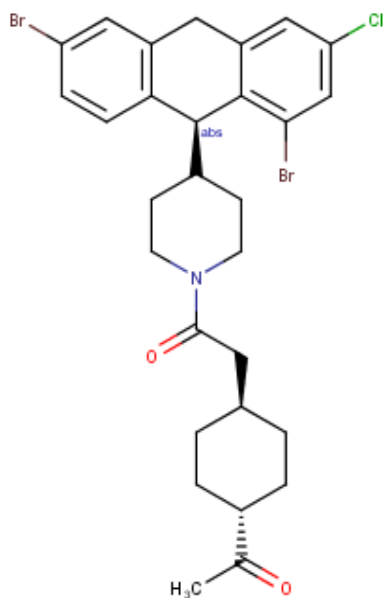

(a)

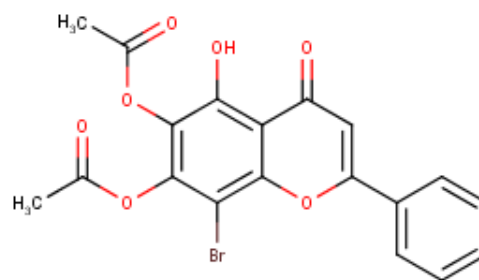

(b)

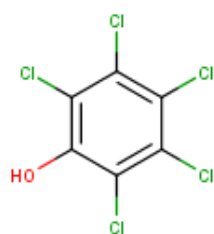

(c)

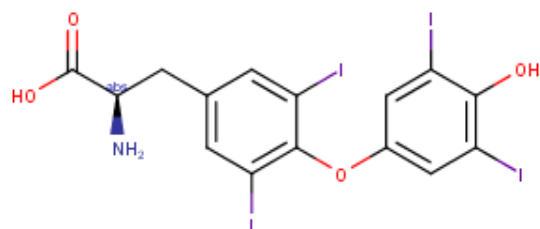

(d)

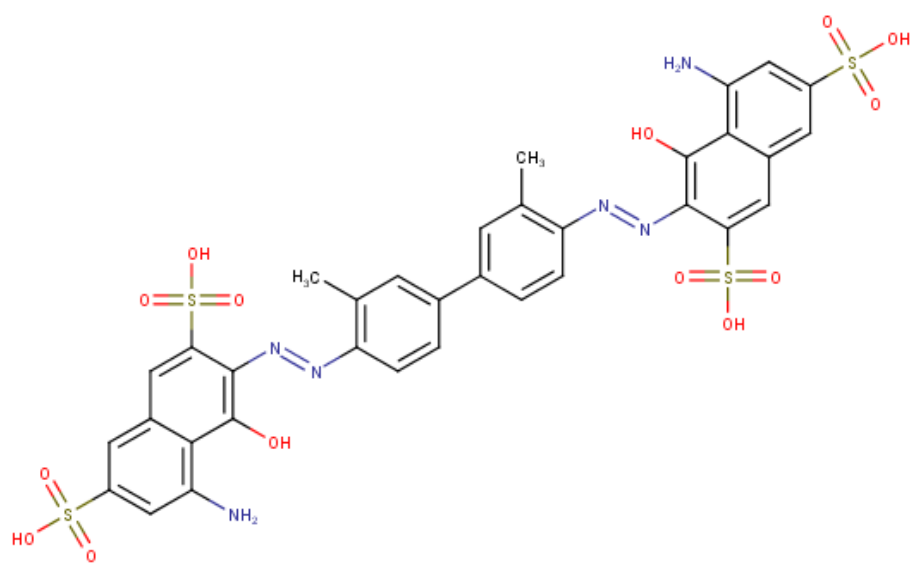

(e)

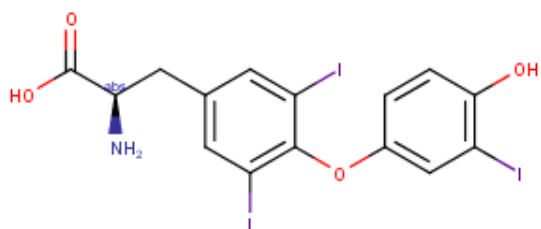

(f)

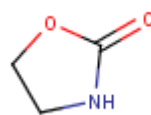

(g)

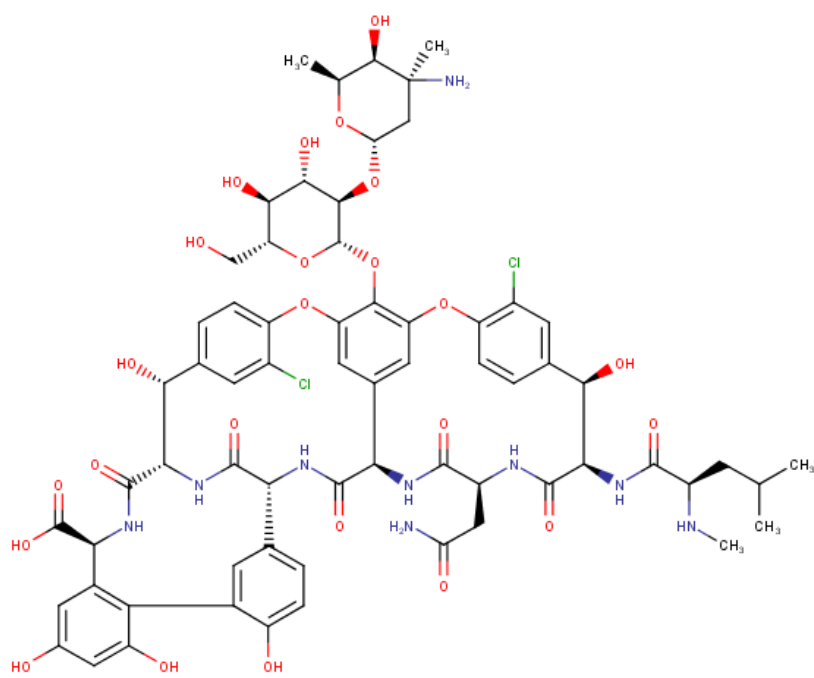

(h)

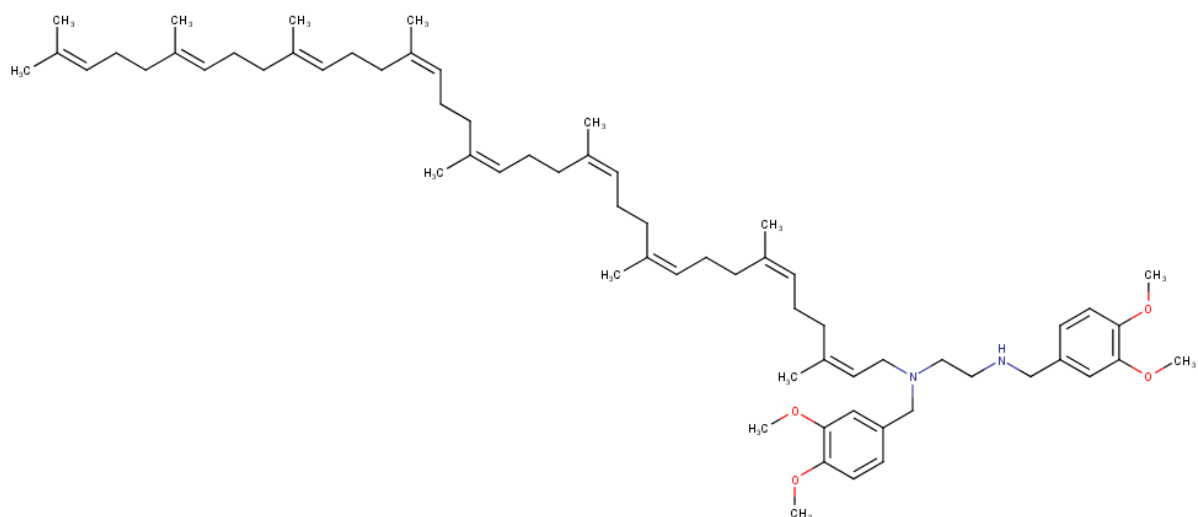

(i)

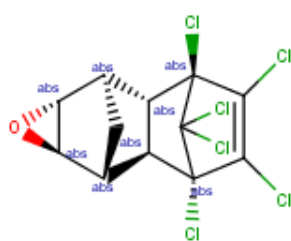

(j)

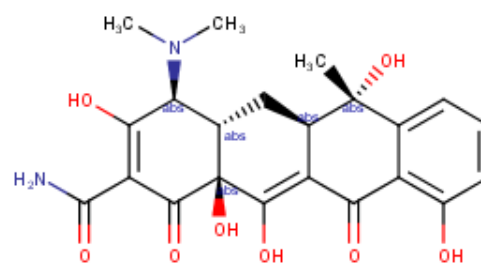

(k)

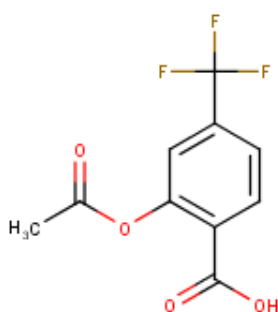

(l)

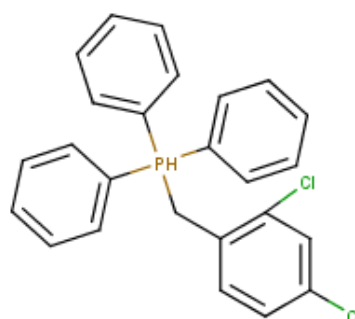

(m)

**Figure S1.** Structures of the compound with largest ED to the central neuron in the V set: (a) 2-(4-acetylcyclohexyl)-1-[4-[(9S)-1,6-dibromo-3-chloro-9,10-dihydroanthracen-9-yl]piperidin-1-yl]ethanone; (b) (7-acetyloxy-8-bromo-5-hydroxy-4-oxo-2-phenylchromen-6-yl) acetate; (c) Pentachlorophenol; (d) Thyroxine; (e) Trypan blue; (f) Triiodothyronine; (g) 2-Oxazolidinone; (h) Vancomycin; (i) Sdb-ethylenediamine; (j) Dieldrin; (k) Tetracycline; (l) Triflusal; (m) (2,4-dichlorophenyl)methyl-triphenylphosphonium.

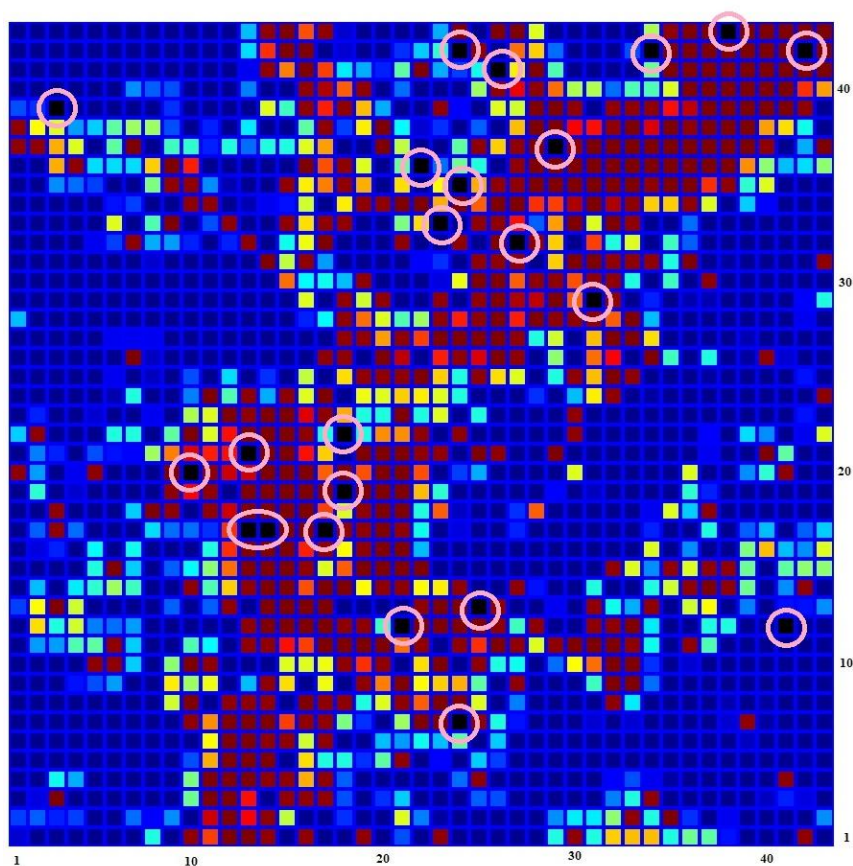

**Figure S3.** Distribution of the 24 overlapping negative compounds (P-gp non-inhibitor (NI) and P-gp non-substrate (NS)) in the response map of the non-active class. These are the only absolutely certain non-active compounds. The position of the neurons where these compounds are located were coloured black and highlighted with a pink circle. They are well spread over the whole area occupied by the all non-active compounds meaning that structural similarity (which is the only influencing factor for forming clusters in the Counter-Propagation Artificial Neural Network output layer) with other non-actives, tested with only one assay, is significant. The only area of non-active compounds that does not include any of the double-tested non-actives, is around the neuron at the position (13, 5) in lower left part of the map, so we may consider the predictions associated with this area less reliable.
